# Supplementary material for: Cardiovascular secondary prevention in high-risk patients: a randomized controlled trial sub-study
Source: PubMed Central journal article supplement (PMC4607173; doi:10.1186/s12872-015-0115-0), 2015-10-14
Supplement: 12872_2015_115_MOESM1_ESM.pdf [file 12872_2015_115_MOESM1_ESM.pdf]

**Additional file 1.** Risk factor values for patients who had target values at baseline

|                                                           | <b>Intervention</b>          | <b>Control</b>               | <b><i>p</i>-value</b> |
|-----------------------------------------------------------|------------------------------|------------------------------|-----------------------|
| <b>LDL-C &lt;2.5/1.8<sup>†</sup> baseline, n</b>          | 135                          | 131                          |                       |
| <b>LDL-C baseline, median<br/>(25th–75th percentile)</b>  | 1.8 (1.5-2.1)                | 1.9 (1.5-2.1)                | 0.77                  |
| <b>LDL-C 12 months, median<br/>(25th–75th percentile)</b> | 2.0 (1.6-2.3) <sup>***</sup> | 1.9 (1.5-2.4) <sup>***</sup> | 0.76                  |
| <b>SBP &lt;140 baseline, n</b>                            | 135                          | 120                          |                       |
| <b>SBP baseline, median<br/>(25th–75th percentile)</b>    | 123 (118-130)                | 125 (120-130)                | 0.66                  |
| <b>SBP 12 months, median<br/>(25th–75th percentile)</b>   | 130 (120-140) <sup>***</sup> | 130 (118-142) <sup>***</sup> | 0.62                  |
| <b>DBP &lt;90 baseline, n</b>                             | 199                          | 189                          |                       |
| <b>DBP baseline, median<br/>(25th–75th percentile)</b>    | 75 (68-80)                   | 74 (70-80)                   | 0.88                  |
| <b>DBP 12 months, median<br/>(25th–75th percentile)</b>   | 74 (67-80) <sup>NS</sup>     | 76 (69-81) <sup>**</sup>     | 0.22                  |

<sup>\*\*</sup> $p \leq 0.01$ , <sup>\*\*\*</sup> $p \leq 0.001$ , indicating a significant change of median values within each group between baseline and 12 months; ; <sup>†</sup>The target LDL-C value was <2.5 mmol/L until 31 March, 2013, when local guidelines for diabetic patients changed this target to <1.8 mmol/L. LDL-C: low density lipoprotein cholesterol (mmol/L); n: number of valid cases; SBP: systolic blood pressure (mmHg); DBP: diastolic blood pressure (mmHg); NS: non-significant.
