# Supplementary material for: Cardiovascular secondary prevention in high-risk patients: a randomized controlled trial sub-study
Source: PubMed Central journal article supplement (PMC4607173; doi:10.1186/s12872-015-0115-0), 2015-10-14
Supplement: 12872_2015_115_MOESM2_ESM.pdf [file 12872_2015_115_MOESM2_ESM.pdf]

**Additional file 2.** Risk factor values for DM patients who had above-target values at baseline

|                                                               | <b>Intervention</b>          | <b>Control</b>              | <b>p-value</b> |
|---------------------------------------------------------------|------------------------------|-----------------------------|----------------|
| <b>LDL-C <math>\geq</math>2.5/1.8<sup>†</sup> baseline, n</b> | 46                           | 34                          |                |
| <b>LDL-C baseline, median<br/>(25th–75th percentile)</b>      | 2.9 (2.5-3.5)                | 2.8 (2.7-3.6)               | 0.71           |
| <b>LDL-C 12 months, median<br/>(25th–75th percentile)</b>     | 2.2 (1.9-3.1) <sup>***</sup> | 2.7 (2.1-3.3) <sup>NS</sup> | 0.04           |
| <b>SBP <math>\geq</math>140 baseline, n</b>                   | 57                           | 57                          |                |
| <b>SBP baseline, median<br/>(25th–75th percentile)</b>        | 150 (142-160)                | 150 (140-160)               | 0.71           |
| <b>SBP 12 months, median<br/>(25th–75th percentile)</b>       | 142 (130-160) <sup>***</sup> | 145 (130-157) <sup>**</sup> | 0.96           |
| <b>DBP <math>\geq</math>90 baseline, n</b>                    | 15                           | 14                          |                |
| <b>DBP baseline, median<br/>(25th–75th percentile)</b>        | 90 (90-93)                   | 90 (90-100)                 | 0.40           |
| <b>DBP 12 months, median<br/>(25th–75th percentile)</b>       | 85 (78-89) <sup>**</sup>     | 80 (75-85) <sup>**</sup>    | 0.38           |

<sup>\*\*</sup> $p \leq 0.01$ , <sup>\*\*\*</sup> $p \leq 0.001$ , indicating a significant change of median values within each group between baseline and 12 months; ; <sup>†</sup>The target LDL-C value was  $<2.5$  mmol/L until 31 March, 2013, when local guidelines for diabetic patients changed this target to  $<1.8$  mmol/L. LDL-C: low density lipoprotein cholesterol (mmol/L); n: number of valid cases; SBP: systolic blood pressure (mmHg); DBP: diastolic blood pressure (mmHg); NS: non-significant.
