# Supplementary material for: Cardiovascular secondary prevention in high-risk patients: a randomized controlled trial sub-study
Source: PubMed Central journal article supplement (PMC4607173; doi:10.1186/s12872-015-0115-0), 2015-10-14
Supplement: 12872_2015_115_MOESM3_ESM.pdf [file 12872_2015_115_MOESM3_ESM.pdf]

**Additional file 3.** Risk factor values for CKD patients who had above-target values at baseline

|                                                               | <b>Intervention</b>          | <b>Control</b>              | <b>p-value</b> |
|---------------------------------------------------------------|------------------------------|-----------------------------|----------------|
| <b>LDL-C <math>\geq</math>2.5/1.8<sup>†</sup> baseline, n</b> | 54                           | 52                          |                |
| <b>LDL-C baseline, median (25th–75th percentile)</b>          | 3.0 (2.7-3.5)                | 3.1 (2.7-3.7)               | 0.33           |
| <b>LDL-C 12 months, median (25th–75th percentile)</b>         | 2.2 (1.8-2.8) <sup>***</sup> | 3.0 (2.6-3.7) <sup>NS</sup> | <0.001         |
| <b>SBP <math>\geq</math>140 baseline, n</b>                   | 47                           | 54                          |                |
| <b>SBP baseline, median (25th–75th percentile)</b>            | 150 (144-155)                | 150 (140-160)               | 0.96           |
| <b>SBP 12 months, median (25th–75th percentile)</b>           | 132 (126-150) <sup>***</sup> | 145 (130-160) <sup>NS</sup> | 0.05           |
| <b>DBP <math>\geq</math>90 baseline, n</b>                    | 12                           | 14                          |                |
| <b>DBP baseline, median (25th–75th percentile)</b>            | 92 (90-99)                   | 90 (90-94)                  | 0.37           |
| <b>DBP 12 months, median (25th–75th percentile)</b>           | 80 (71-84) <sup>**</sup>     | 84 (79-94) <sup>**</sup>    | 0.07           |

<sup>\*\*</sup>p  $\leq$  0.01, <sup>\*\*\*</sup>p  $\leq$  0.001, indicating a significant change of median values within each group between baseline and 12 months; ; <sup>†</sup>The target LDL-C value was <2.5 mmol/L until 31 March, 2013, when local guidelines for diabetic patients changed this target to <1.8 mmol/L. LDL-C: low density lipoprotein cholesterol (mmol/L); n: number of valid cases; SBP: systolic blood pressure (mmHg); DBP: diastolic blood pressure (mmHg); NS: non-significant.
